# Supplementary material for: Refine the crystallinity of upconversion nanoparticles for NIR-enhanced photocatalysis
Source: Royal Society of Chemistry journal article supplement (doi:10.1039/d1ce00550b), 2021-01-01
Supplement: d1ce00550b1.pdf [file d1ce00550b1.pdf]

## Supporting Information

### 1. Materials and instruments

#### 1.1 Materials

$\text{Y}(\text{CH}_3\text{COOH})_3 \cdot 4\text{H}_2\text{O}$ ,  $\text{Yb}(\text{CH}_3\text{COOH})_3 \cdot 4\text{H}_2\text{O}$ ,  $\text{Tm}(\text{CH}_3\text{COOH})_3 \cdot 4\text{H}_2\text{O}$ ,  $\text{Gd}(\text{CH}_3\text{COOH})_3 \cdot 4\text{H}_2\text{O}$ , oleic acid, 1-octadecene, and polyvinylpyrrolidone (Mw=40,000) were purchased from Sigma-Aldrich. 1,4-benzoquinone, ethylenediaminetetraacetate, and 2-aminoterephthalic acid, and Rhodamine B were purchased from Adamas. NaOH,  $\text{NH}_4\text{F}$ , Chromium nitrate nonahydrate and isopropanol were purchased from Greagent. All the chemical reagents were used as received without further purification.

#### 1.2 Experimental and characterization instruments

The microstructure of NYT, NYTG(3%), and NYTG(3%)/NMC were studied by a transmission electron microscope (TEM, JEM-2100, operated at 200 kV). The crystal structures of all the samples were analyzed by the X-ray diffraction instrument (XRD, Bruker D8 Advance) with a Cu  $\text{K}\alpha$  radiation source ( $\lambda = 0.15418$  nm) operated at 40 kV and 40 mA. The UV-Vis-NIR diffuse reflectance spectra (DRS) of the as-prepared solid samples were investigated by using a PE Lambda 950 spectrophotometer, which equipped with an integrating sphere. The upconversion luminescence spectra were obtained by using a Fluorescence spectra were recorded on FluoroMax+ spectrometer with an external 980 nm NIR laser. The XPS spectra were performed by Thermo Scientific K- $\alpha$  + XPS spectrometer with the monochromatized Al-K $\alpha$  X-ray source ( $h\nu = 1486.8$  eV). The 400  $\mu\text{m}$  X-ray spot was used for XPS analysis. The absorbance of RhB in aqueous solutions was measured using a UH4150 spectrophotometer. Photocatalytic efficiency of RhB decomposition was tested under UV-Visible (<760 nm), near-infrared light (>760 nm) and full-spectra-light

irradiation with a 300 W Xenon lamp (Perfect Light PLS-SXE-300+) that equipped with a cooling system for temperature control. The simulated solar light photocatalysis reaction was carried out using a solar simulator (AM 1.5 G).

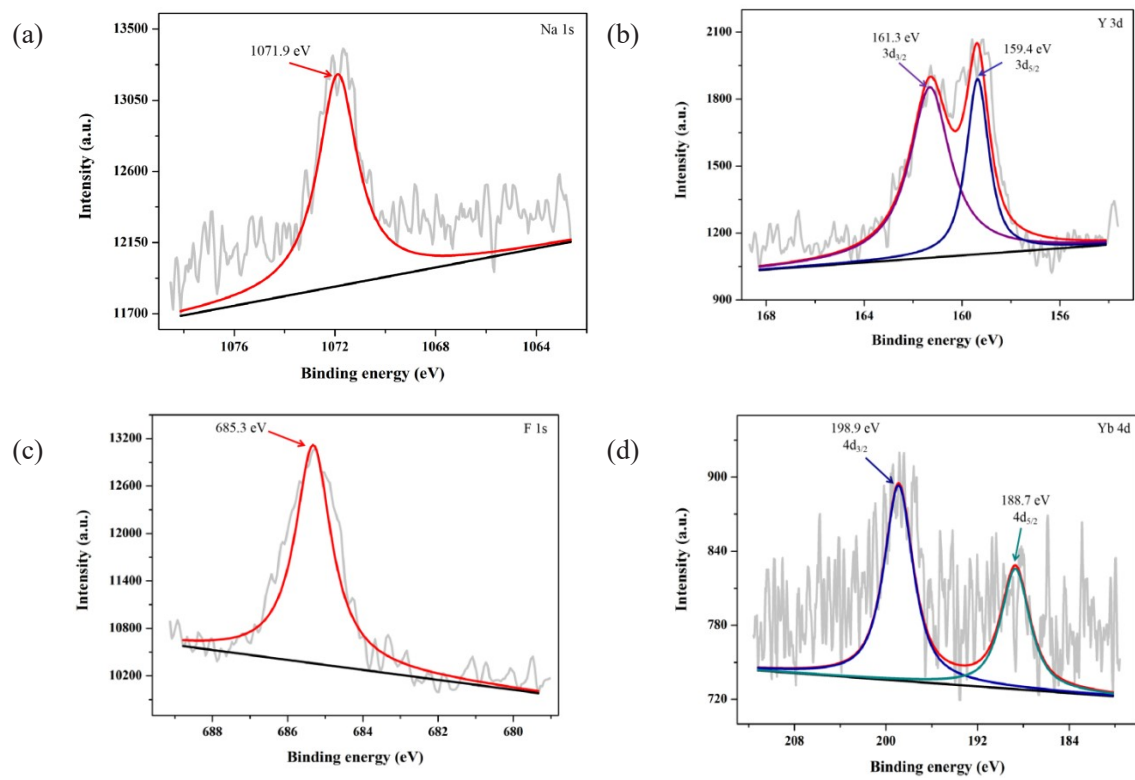

**Fig. S1.** XPS spectra of NYTG(3%)/NMC: (a) Na 1s, (b) Y 3d, (c) F 1s, and (d) Yb 4d

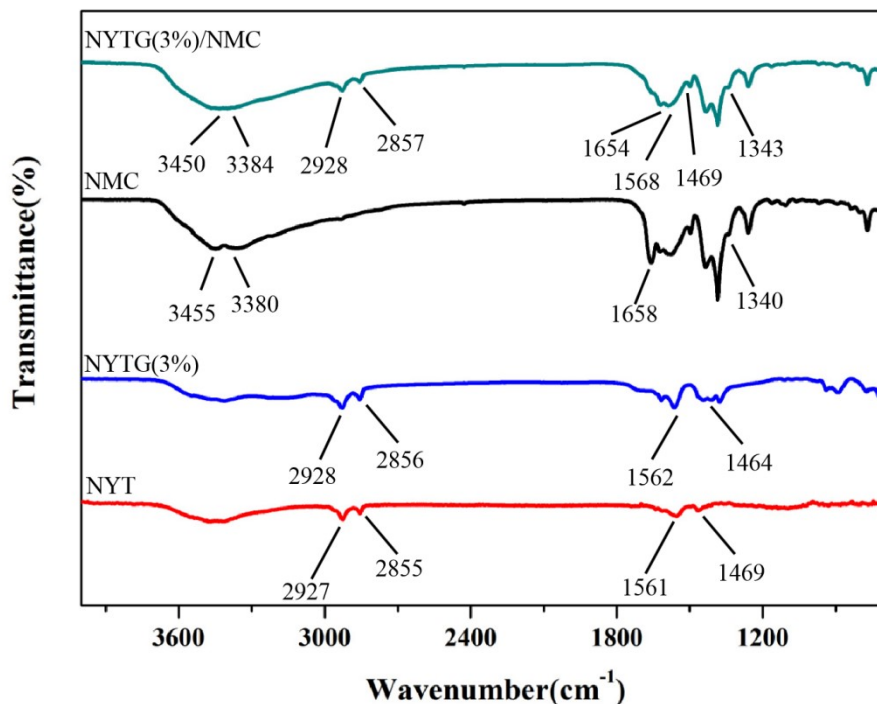

**Fig. S2.** Fourier transform infrared (FTIR) spectra of NYT, NYTG(3%), NMC, and NYTG(3%)/NMC samples.

Fig. S2 demonstrated the FT-IR spectra of NYT, NYTG(3%), NMC, and NYTG(3%)/NMC samples. For the NYTG(3%)/NMC sample, the peaks of NYTG(3%) and NMC are all observed indicating that NYTG(3%)/NMC was successfully synthesized. The peak at  $1658\text{ cm}^{-1}$  was attributed to the N-H bending vibration of the amino groups in NMC. And the tiny peak at  $1340\text{ cm}^{-1}$  corresponds to the C-N stretching on benzene ring. Moreover, the double peaks at  $3455\text{ cm}^{-1}$  and  $3380\text{ cm}^{-1}$  can be assigned to asymmetric and symmetric vibration of the amino groups in NMC. The peaks at around  $2928$  and  $2855\text{ cm}^{-1}$  corresponding to  $-\text{CH}_2-$  group and peaks near  $1562$  and  $1464\text{ cm}^{-1}$  corresponding to  $-\text{COOH}$  group were clearly observed suggesting that the successful involvement of NYT and NYTG(3%). The introduction of  $\text{Gd}^{3+}$  ions does not change the infrared peak of upconversion nanoparticles.

**Table S1** Photodegradation performance of different upconversion nanoparticles based photocatalysts.

| Ln-UCNPs                                                       | Coating materials                                          | Light source       | Pollutant      | Degradation ratio/time (min) | Ref.      |
|----------------------------------------------------------------|------------------------------------------------------------|--------------------|----------------|------------------------------|-----------|
| NaYF <sub>4</sub> :Yb,Tm                                       | TiO <sub>2</sub> , Fe <sub>3</sub> O <sub>4</sub>          | simulated sunlight | MB             | 75%/50                       | 1         |
| NaYF <sub>4</sub> :Gd,Si                                       | TiO <sub>2</sub>                                           | simulated sunlight | MB             | 70%/240                      | 2         |
| BiOBr:Yb,Er<br>3D<br>Hierarchical<br>Architectures             | /                                                          | simulated sunlight | RhB            | 100%/40                      | 3         |
| NaLuF <sub>4</sub> :Gd,Yb<br>,Tm@NaLuF <sub>4</sub> :<br>Gd,Yb | SiO <sub>2</sub> , Ag, g-<br>C <sub>3</sub> N <sub>4</sub> | simulated sunlight | RhB            | 100%/150                     | 4         |
| NaYF <sub>4</sub> :Yb,Tm<br>@NaYF <sub>4</sub>                 | Zn <sub>0.5</sub> Cd <sub>0.5</sub> S                      | simulated sunlight | Cr(VI)         | 98.7%/30                     | 5         |
| NaYF <sub>4</sub> :Yb,Tm                                       | TiO <sub>2</sub>                                           | simulated sunlight | deoxynivalenol | 90.7%/60                     | 6         |
| NaYF <sub>4</sub>                                              | SnO <sub>2</sub> , Ag                                      | simulated sunlight | RhB            | 100%/30                      | 7         |
| NaYF <sub>4</sub> :Yb,Tm,<br>Gd                                | NH <sub>2</sub> -MIL-<br>101(Cr)                           | simulated sunlight | RhB            | 79%/90                       | This work |

## References

- 1 Y. Lv, L. Yue, Q. Li, B. Y. Shao, S. Zhao, H. T. Wang, S. J. Wu, Z. J. Wang, Recyclable  $(\text{Fe}_3\text{O}_4\text{-NaYF}_4\text{:Yb,Tm})@\text{TiO}_2$  nanocomposites with near-infrared enhanced photocatalytic activity, *Dalton Trans.*, 2018, 47, 1666-1673.
- 2 S. Mavengere, J. S. Kim, UV-visible light photocatalytic properties of  $\text{NaYF}_4\text{:}(\text{Gd, Si})/\text{TiO}_2$  composites, *Appl. Surf. Sci.* 2018, 444, 491-496.
- 3 Y. J. Li, D. K. Xu, L. Yao, S. H. Yang, Y. L. Zhang, Enhanced upconversion luminescence in controllable self-assembled  $\text{BiOBr:Yb}^{3+}/\text{Er}^{3+}$  3D hierarchical architectures and their application in NIR photocatalysis, *Ind. Eng. Chem. Res.* 2018, 57, 17161–17169.
- 4 F. F. Zhao, K. K. Khaing, D. G. Yin, B. Q. Liu, T. Chen, C. L. Wu, K. X. Huang, L. L. Deng, L. Q. Li, Large enhanced photocatalytic activity of  $g\text{-C}_3\text{N}_4$  by fabrication of a nanocomposite with introducing upconversion nanocrystal and Ag nanoparticles, *RSC Adv.*, 2018, 8, 42308-42321.
- 5 W. N. Wang, W. Dong, C. X. Huang, B. Liu, S. Cheng, H. S. Qian, UCNPs@ $\text{Zn}_{0.5}\text{Cd}_{0.5}\text{S}$  core-shell and yolk-shell nanostructures: selective synthesis, characterization, and near-infrared-mediated photocatalytic reduction of Cr(VI), *J. Nanomater.*, 2018, 2018, 1-9.
- 6 S. J. Wu, F. Wang, Q. Li, J. Wang, Y. Zhou, N. Duan, S. Niazi, Z. P. Wang, Photocatalysis and degradation products identification of deoxynivalenol in wheat using upconversion nanoparticles@ $\text{TiO}_2$  composite, *Food Chem.*, 2020, 323, 126823.

7 Q. Y. Tian, W. J. Yao, W. Wu, J. Liu, Z. H. Wu, L. Liu, Z. G. Dai, Efficient UV–Vis-NIR responsive upconversion and plasmonic-enhanced photocatalyst based on lanthanide-doped NaYF<sub>4</sub>/SnO<sub>2</sub>/Ag, ACS Sustain. Chem. Eng. 2017, 5, 10889-10899.
